# Supplementary material for: Ideas and perspectives: Mineralizing Fluid Control on Minor Elements in Biogenic CaCO 3 : Insights from Otoliths
Source: Copernicus journal article supplement (doi:10.5194/egusphere-2025-5251), 2025-11-07
Supplement: Supplementary file 1 [file inorganic vs otolith-endolymph.xlsx]

## Sheet: fish_data
species	elements	[end] (mean) ppm	[end](±sd)	[oto] (mean) ppm	[oto] (±sd)	[water] ppm	[water] sd	R end mean	sd	R Oto mean	sd	Rwater	sd	D1	D1sd	D4	D4sd
Lota lota	Na	1560	220	2033	297	9.4	0.1	38.4236	7.19403	0.00507702	0.000741699	0.354717	0.00655039	0.000132133	3.13789e-05	0.0143129	0.0021076
Lota lota	Mg	2.84	0.6	11.7	4	6.52	0.1	0.0699507	0.0171059	2.92184e-05	9.98921e-06	0.246038	0.00529453	0.0004177	0.000175575	0.000118756	4.06807e-05
Lota lota	Ca	40.6	5	400432		26.5	0.4
Lota lota	Sr	0.099	0.01	694	67	0.131	0.001	0.00243842	0.000388388	0.00173313	0.000167319	0.0049434	8.36166e-05	0.710758	0.13238	0.350595	0.0343626
Lota lota	Ba	0.275	0.1	10	3	0.0185	0.0004	0.0067734	0.00260047	2.4973e-05	7.49191e-06	0.000698113	1.84087e-05	0.00368693	0.0017964	0.0357722	0.010773
Lota lota	Zn	0.882	0.2	1.4	0.6	0.0012	0.0006	0.0217241	0.00560573	3.49622e-06	1.49838e-06	4.5283e-05	2.26518e-05	0.000160937	8.05103e-05	0.0772083	0.050858
Salvelinus namaycush	Na	1330	340	2499	396	9.4	0.1	25.8755	8.6267	0.00624076	0.000988932	0.354717	0.00655039	0.000241184	8.90298e-05	0.0175936	0.00280681
Salvelinus namaycush	Mg	4.89	3	13.4	2	6.52	0.1	0.0951362	0.0618149	3.34639e-05	4.99461e-06	0.246038	0.00529453	0.000351747	0.000234501	0.000136011	2.05101e-05
Salvelinus namaycush	Ca	51.4	11	400432		26.5	0.4
Salvelinus namaycush	Sr	0.093	0.03	544	90	0.131	0.001	0.00180934	0.000700421	0.00135853	0.000224757	0.0049434	8.36166e-05	0.750845	0.316094	0.274818	0.0457032
Salvelinus namaycush	Ba	0.193	0.02	1	0.6	0.0185	0.0004	0.00375486	0.00089282	2.4973e-06	1.49838e-06	0.000698113	1.84087e-05	0.000665085	0.000429244	0.00357722	0.0021484
Salvelinus namaycush	Zn	0.868	0.4	7	3	0.0012	0.0006	0.0168872	0.00858032	1.74811e-05	7.49191e-06	4.5283e-05	2.26518e-05	0.00103517	0.000688087	0.386041	0.25429
Sander vitreus	Na	1819	306	1366	260	19	5	17.8333	3.56352	0.00341132	0.000649299	0.275362	0.0763174	0.000191289	5.27893e-05	0.0123885	0.00416521
Sander vitreus	Mg	21	3	8	5	21	1	0.205882	0.0368514	1.99784e-05	1.24865e-05	0.304348	0.0301735	9.70381e-05	6.30869e-05	6.56434e-05	4.15401e-05
Sander vitreus	Ca	102	11	400432		69	6
Sander vitreus	Sr	0.12	0.01	432	24	0.9	0.4	0.00117647	0.00016034	0.00107883	5.99353e-05	0.0130435	0.00590702	0.91701	0.134963	0.0827107	0.0377381
Sander vitreus	Ba	0.83	0.1	4.7	0.6	0.048	0.003	0.00813725	0.00131577	1.17373e-05	1.49838e-06	0.000695652	7.44955e-05	0.00144242	0.000297163	0.0168724	0.0028114
Sander vitreus	Zn	3.2	0.7	4	2	0.009	0.001	0.0313725	0.00765141	9.98921e-06	4.99461e-06	0.000130435	1.84034e-05	0.000318406	0.000177133	0.076584	0.0397873
species	elements	D*100	Roto_mean	Rend_mean	Roto_MIN	Roto_MAX	Rend_MIN	Rend_MAX	Dmin	Dmax	Dmean
Acanthopagrus butcheri	Li	3.25	8.5	261	7.2	10.3	108.1	539.6	0.0133432	0.0952821	0.0325
Acanthopagrus butcheri	Mg	0.02	86	348564	76.1	101.8	256831	470802	0.000161639	0.000396369	0.0002
Acanthopagrus butcheri	Sr	137.27	10644	7754	9990.3	11126.9	7037.6	8135.3	1.22802	1.58106	1.3727
Acanthopagrus butcheri	Ba	22.59	17.5	77	8.1	42.6	43.6	127.1	0.0637293	0.977064	0.2259
Literature data
Original data

## Sheet: Inorganic_data
System	Elements	D	Literature			Elements	Dmean	Dsd	Dmin	Dmax
Inorganic	Zn	0.125893	Brazier et al., 2024			Zn	0.231588	0.158091	0.0630957	0.630957
Inorganic	Zn	0.316228	Brazier et al., 2024			Ba	0.976772	0.871662	3.98107e-05	4.43702		Literature data
Inorganic	Zn	0.251189	Brazier et al., 2024			Mg	0.0550352	0.257216	1.86209e-05	1.29169
Inorganic	Zn	0.251189	Brazier et al., 2024			Sr	1.1149	0.450245	0.00015	2.55		Original data
Inorganic	Zn	0.158489	Brazier et al., 2024			Na	0.00012293	0.000107552	1.12202e-05	0.00055
Inorganic	Zn	0.630957	Brazier et al., 2024			Li	0.000599377	0.00105901	1.38038e-05	0.0043
Inorganic	Zn	0.0630957	Brazier et al., 2024
Inorganic	Zn	0.125893	Brazier et al., 2024
Inorganic	Zn	0.1	Brazier et al., 2024
Inorganic	Zn	0.398107	Brazier et al., 2024
Inorganic	Zn	0.158489	Brazier et al., 2024
Inorganic	Zn	0.199526	Brazier et al., 2024
Inorganic	Ba	4.43702	Gaetani & Cohen 2006
Inorganic	Ba	2.85999	Gaetani & Cohen 2006
Inorganic	Ba	1.98859	Gaetani & Cohen 2006
Inorganic	Ba	1.31488	Gaetani & Cohen 2006
Inorganic	Ba	0.718178	Gaetani & Cohen 2006
Inorganic	Ba	0.561157	Gaetani & Cohen 2006
Inorganic	Ba	0.492835	Gaetani & Cohen 2006
Inorganic	Ba	0.218776	Mavromatis et al., 2018
Inorganic	Ba	0.398107	Mavromatis et al., 2018
Inorganic	Ba	0.57544	Mavromatis et al., 2018
Inorganic	Ba	0.676083	Mavromatis et al., 2018
Inorganic	Ba	0.389045	Mavromatis et al., 2018
Inorganic	Ba	0.660693	Mavromatis et al., 2018
Inorganic	Ba	0.269153	Mavromatis et al., 2018
Inorganic	Ba	0.501187	Mavromatis et al., 2018
Inorganic	Ba	0.346737	Mavromatis et al., 2018
Inorganic	Ba	0.467735	Mavromatis et al., 2018
Inorganic	Ba	0.436516	Mavromatis et al., 2018
Inorganic	Ba	0.436516	Mavromatis et al., 2018
Inorganic	Ba	0.398107	Mavromatis et al., 2018
Inorganic	Ba	1.815	Dietzel et al., 2004
Inorganic	Ba	1.963	Dietzel et al., 2004
Inorganic	Ba	1.964	Dietzel et al., 2004
Inorganic	Ba	1.856	Dietzel et al., 2004
Inorganic	Ba	1.453	Dietzel et al., 2004
Inorganic	Ba	1.134	Dietzel et al., 2004
Inorganic	Ba	1.359	Dietzel et al., 2004
Inorganic	Ba	0.883	Dietzel et al., 2004
Inorganic	Ba	0.701	Dietzel et al., 2004
Inorganic	Ba	0.782	Dietzel et al., 2004
Inorganic	Ba	0.685	Dietzel et al., 2004
Inorganic	Ba	0.5	Dietzel et al., 2004
Inorganic	Ba	0.611	Dietzel et al., 2004
Inorganic	Ba	0.615	Dietzel et al., 2004
Inorganic	Ba	0.696	Dietzel et al., 2004
Inorganic	Mg	3.98107e-05	Mavromatis et al., 2022
Inorganic	Mg	5.12861e-05	Mavromatis et al., 2022
Inorganic	Mg	6.45654e-05	Mavromatis et al., 2022
Inorganic	Mg	5.62341e-05	Mavromatis et al., 2022
Inorganic	Mg	1.99526e-05	Mavromatis et al., 2022
Inorganic	Mg	3.71535e-05	Mavromatis et al., 2022
Inorganic	Mg	7.4131e-05	Mavromatis et al., 2022
Inorganic	Mg	0.000125893	Mavromatis et al., 2022
Inorganic	Mg	0.000131826	Mavromatis et al., 2022
Inorganic	Mg	0.000128825	Mavromatis et al., 2022
Inorganic	Mg	1.86209e-05	Mavromatis et al., 2022
Inorganic	Mg	4.67735e-05	Mavromatis et al., 2022
Inorganic	Mg	6.16595e-05	Mavromatis et al., 2022
Inorganic	Mg	8.91251e-05	Mavromatis et al., 2022
Inorganic	Mg	2.51189e-05	Mavromatis et al., 2022
Inorganic	Mg	5.37032e-05	Mavromatis et al., 2022
Inorganic	Mg	7.76247e-05	Mavromatis et al., 2022
Inorganic	Mg	0.000120226	Mavromatis et al., 2022
Inorganic	Mg	0.000177828	Mavromatis et al., 2022
Inorganic	Mg	0.000138038	Mavromatis et al., 2022
Inorganic	Mg	3.98107e-05	Mavromatis et al., 2022
Inorganic	Mg	6.45654e-05	Mavromatis et al., 2022
Inorganic	Mg	0.000147911	Mavromatis et al., 2022
Inorganic	Mg	0.000162181	Mavromatis et al., 2022
Inorganic	Mg	0.000165959	Mavromatis et al., 2022
Inorganic	Mg	0.000218776	Mavromatis et al., 2022
Inorganic	Mg	5.49541e-05	Mavromatis et al., 2022
Inorganic	Mg	7.94328e-05	Mavromatis et al., 2022
Inorganic	Mg	0.000158489	Mavromatis et al., 2022
Inorganic	Mg	0.000190546	Mavromatis et al., 2022
Inorganic	Mg	0.000218776	Mavromatis et al., 2022
Inorganic	Mg	8.12831e-05	Mavromatis et al., 2022
Inorganic	Mg	0.000147911	Mavromatis et al., 2022
Inorganic	Mg	0.000301995	Mavromatis et al., 2022
Inorganic	Mg	0.000338844	Mavromatis et al., 2022
Inorganic	Mg	0.00030903	Mavromatis et al., 2022
Inorganic	Mg	0.000416869	Mavromatis et al., 2022
Inorganic	Mg	0.00137685	Gaetani & Cohen 2006
Inorganic	Mg	0.00102731	Gaetani & Cohen 2006
Inorganic	Mg	0.000786137	Gaetani & Cohen 2006
Inorganic	Mg	0.00113208	Gaetani & Cohen 2006
Inorganic	Mg	0.00093534	Gaetani & Cohen 2006
Inorganic	Mg	0.000418132	Gaetani & Cohen 2006
Inorganic	Mg	0.000373426	Gaetani & Cohen 2006
Inorganic	Sr	1.29169	Gaetani & Cohen 2006
Inorganic	Sr	1.17425	Gaetani & Cohen 2006
Inorganic	Sr	1.11792	Gaetani & Cohen 2006
Inorganic	Sr	1.07631	Gaetani & Cohen 2006
Inorganic	Sr	0.908906	Gaetani & Cohen 2006
Inorganic	Sr	0.88433	Gaetani & Cohen 2006
Inorganic	Sr	0.813721	Gaetani & Cohen 2006
Inorganic	Sr	1.09	Zhong & Mucci, 1989
Inorganic	Sr	0.91	Zhong & Mucci, 1989
Inorganic	Sr	1.07	Zhong & Mucci, 1989
Inorganic	Sr	0.94	Zhong & Mucci, 1989
Inorganic	Sr	0.9	Zhong & Mucci, 1989
Inorganic	Sr	1.04	Zhong & Mucci, 1989
Inorganic	Sr	0.99	Zhong & Mucci, 1989
Inorganic	Sr	1.02	Zhong & Mucci, 1989
Inorganic	Sr	1.05	Zhong & Mucci, 1989
Inorganic	Sr	0.93	Zhong & Mucci, 1989
Inorganic	Sr	0.95	Zhong & Mucci, 1989
Inorganic	Sr	0.97	Zhong & Mucci, 1989
Inorganic	Sr	0.93	Zhong & Mucci, 1989
Inorganic	Sr	0.97	Zhong & Mucci, 1989
Inorganic	Sr	0.94	Zhong & Mucci, 1989
Inorganic	Sr	0.9	Zhong & Mucci, 1989
Inorganic	Sr	1.234	Dietzel et al., 2004
Inorganic	Sr	1.21	Dietzel et al., 2004
Inorganic	Sr	1.13	Dietzel et al., 2004
Inorganic	Sr	1.51	Dietzel et al., 2004
Inorganic	Sr	1.175	Dietzel et al., 2004
Inorganic	Sr	1.166	Dietzel et al., 2004
Inorganic	Sr	1.188	Dietzel et al., 2004
Inorganic	Sr	1.108	Dietzel et al., 2004
Inorganic	Sr	1.125	Dietzel et al., 2004
Inorganic	Sr	1.107	Dietzel et al., 2004
Inorganic	Sr	1.1	Dietzel et al., 2004
Inorganic	Sr	1.064	Dietzel et al., 2004
Inorganic	Sr	1.061	Dietzel et al., 2004
Inorganic	Sr	1.047	Dietzel et al., 2004
Inorganic	Sr	1.08	Dietzel et al., 2004
Inorganic	Sr	1.019	Dietzel et al., 2004
Inorganic	Sr	0.989	Dietzel et al., 2004
Inorganic	Sr	2.55	J.-M. Brazier et al. 2023
Inorganic	Sr	1.61	J.-M. Brazier et al. 2023
Inorganic	Sr	1.13	J.-M. Brazier et al. 2023
Inorganic	Sr	2.13	J.-M. Brazier et al. 2023
Inorganic	Sr	1.28	J.-M. Brazier et al. 2023
Inorganic	Sr	2.27	J.-M. Brazier et al. 2023
Inorganic	Sr	1.69	J.-M. Brazier et al. 2023
Inorganic	Sr	1.17	J.-M. Brazier et al. 2023
Inorganic	Sr	1.89	J.-M. Brazier et al. 2023
Inorganic	Sr	1.54	J.-M. Brazier et al. 2023
Inorganic	Sr	1	Dietzel et al., 2004
Inorganic	Na	0.00015	Kawabata et al., 2021
Inorganic	Na	0.00024	Kawabata et al., 2021
Inorganic	Na	0.00024	Kawabata et al., 2021
Inorganic	Na	0.00037	Kawabata et al., 2021
Inorganic	Na	0.00039	Kawabata et al., 2021
Inorganic	Na	0.00055	Kawabata et al., 2021
Inorganic	Na	2.39883e-05	Mavromatis et al.,2024
Inorganic	Na	0.000281838	Mavromatis et al.,2024
Inorganic	Na	4.2658e-05	Mavromatis et al.,2024
Inorganic	Na	4.16869e-05	Mavromatis et al.,2024
Inorganic	Na	5.01187e-05	Mavromatis et al.,2024
Inorganic	Na	6.30957e-05	Mavromatis et al.,2024
Inorganic	Na	6.16595e-05	Mavromatis et al.,2024
Inorganic	Na	3.31131e-05	Mavromatis et al.,2024
Inorganic	Na	6.45654e-05	Mavromatis et al.,2024
Inorganic	Na	7.58578e-05	Mavromatis et al.,2024
Inorganic	Na	0.000123027	Mavromatis et al.,2024
Inorganic	Na	0.000112202	Mavromatis et al.,2024
Inorganic	Na	0.000123027	Mavromatis et al.,2024
Inorganic	Na	0.000107152	Mavromatis et al.,2024
Inorganic	Na	4.2658e-05	Mavromatis et al.,2024
Inorganic	Na	6.60693e-05	Mavromatis et al.,2024
Inorganic	Na	9.77237e-05	Mavromatis et al.,2024
Inorganic	Na	2.5704e-05	Mavromatis et al.,2024
Inorganic	Na	7.24436e-05	Mavromatis et al.,2024
Inorganic	Na	9.12011e-05	Mavromatis et al.,2024
Inorganic	Na	0.000125893	Mavromatis et al.,2024
Inorganic	Na	0.000141254	Mavromatis et al.,2024
Inorganic	Na	3.98107e-05	Mavromatis et al.,2024
Inorganic	Na	0.000109648	Mavromatis et al.,2024
Inorganic	Na	0.000131826	Mavromatis et al.,2024
Inorganic	Na	0.000144544	Mavromatis et al.,2024
Inorganic	Na	0.00017378	Mavromatis et al.,2024
Inorganic	Na	6.0256e-05	Mavromatis et al.,2024
Inorganic	Na	5.7544e-05	Mavromatis et al.,2024
Inorganic	Na	0.000107152	Mavromatis et al.,2024
Inorganic	Na	0.000123027	Mavromatis et al.,2024
Inorganic	Na	0.000147911	Mavromatis et al.,2024
Inorganic	Na	0.00017378	Mavromatis et al.,2024
Inorganic	Na	0.0001	Mavromatis et al.,2024
Inorganic	Na	0.000104713	Mavromatis et al.,2024
Inorganic	Na	0.000194984	Mavromatis et al.,2024
Inorganic	Na	0.00020893	Mavromatis et al.,2024
Inorganic	Na	0.000269153	Mavromatis et al.,2024
Inorganic	Li	1.12202e-05	Mavromatis et al.,2024
Inorganic	Li	2.69153e-05	Mavromatis et al.,2024
Inorganic	Li	4.67735e-05	Mavromatis et al.,2024
Inorganic	Li	7.76247e-05	Mavromatis et al.,2024
Inorganic	Li	0.000151356	Mavromatis et al.,2024
Inorganic	Li	1.38038e-05	Mavromatis et al.,2024
Inorganic	Li	1.77828e-05	Mavromatis et al.,2024
Inorganic	Li	5.62341e-05	Mavromatis et al.,2024
Inorganic	Li	0.000123027	Mavromatis et al.,2024
Inorganic	Li	0.00020893	Mavromatis et al.,2024
Inorganic	Li	0.000229087	Mavromatis et al.,2024
Inorganic	Li	0.000223872	Mavromatis et al.,2024
Inorganic	Li	0.000112202	Mavromatis et al.,2024
Inorganic	Li	0.000158489	Mavromatis et al.,2024
Inorganic	Li	2.29087e-05	Mavromatis et al.,2024
Inorganic	Li	4.36516e-05	Mavromatis et al.,2024
Inorganic	Li	0.000109648	Mavromatis et al.,2024
Inorganic	Li	0.000199526	Mavromatis et al.,2024
Inorganic	Li	0.000251189	Mavromatis et al.,2024
Inorganic	Li	3.54813e-05	Mavromatis et al.,2024
Inorganic	Li	9.54993e-05	Mavromatis et al.,2024
Inorganic	Li	0.000229087	Mavromatis et al.,2024
Inorganic	Li	0.000281838	Mavromatis et al.,2024
Inorganic	Li	0.000301995	Mavromatis et al.,2024
Inorganic	Li	0.000398107	Mavromatis et al.,2024
Inorganic	Li	3.98107e-05	Mavromatis et al.,2024
Inorganic	Li	8.91251e-05	Mavromatis et al.,2024
Inorganic	Li	0.000218776	Mavromatis et al.,2024
Inorganic	Li	0.000251189	Mavromatis et al.,2024
Inorganic	Li	0.000331131	Mavromatis et al.,2024
Inorganic	Li	0.000380189	Mavromatis et al.,2024
Inorganic	Li	5.62341e-05	Mavromatis et al.,2024
Inorganic	Li	0.000162181	Mavromatis et al.,2024
Inorganic	Li	0.000501187	Mavromatis et al.,2024
Inorganic	Li	0.000594292	Mavromatis et al.,2024
Inorganic	Li	0.000549541	Mavromatis et al.,2024
Inorganic	Li	0.000660693	Mavromatis et al.,2024
Inorganic	Li	0.0043	Marriott et al., 2004b
Inorganic	Li	0.0026	Marriott et al., 2004b
Inorganic	Li	0.0033	Marriott et al., 2004b
Inorganic	Li	0.003	Marriott et al., 2004b
Inorganic	Li	0.003	Marriott et al., 2004b

## Sheet: Calculation for Fig_3
Fish species	elements	Molar mass	water	water_sd	blood	blood_sd	end	end_sd	oto	oto_sd	water(mmol/mol)	water(mmol/mol)_sd	blood(mmol/mol)	blood(mmol/mol)_sd	end(mmol/mol)	end(mmol/mol)_sd	oto(mmol/mol)	oto(mmol/mol)_sd	Rw(mmol/mol)	Rw_sd	Rb(mmol/mol)	Rb_sd	Re(mmol/mol)	Re_sd	Ro(mmol/mol)	Ro_sd	Ro1_(mmol/mol)	Ro1_sd	Ro2_(mmol/mol)	Ro2_sd
burbot	Mg	24.31	6.52	0.1	66.4	11	2.84	0.6	11.7	4	0.268202	0.00411353	2.73139	0.452489	0.116824	0.0246812	0.481283	0.164541	0.405643	0.00872912	1.36501	0.341049	0.115328	0.0282025	4.81726e-05	1.64693e-05	0.00174068	0.0065782	0.00399622	0.0150786
burbot	Ca	40.08	26.5	0.4	80.2	15	40.6	5	400432		0.661178	0.00998004	2.001	0.374251	1.01297	0.12475	9990.82
burbot	Sr	87.62	0.131	0.001	0.213	0.03	0.099	0.01	694	67	0.00149509	1.14129e-05	0.00243095	0.000342388	0.00112988	0.000114129	7.92057	0.764666	0.00226126	3.82487e-05	0.00121487	0.000284442	0.00111541	0.00017766	0.000792785	7.65368e-05	0.000482458	0.000159453	0.000638404	0.000200957
burbot	Ba	137.33	0.0185	0.0004	0.37	0.12	0.275	0.1	10	3	0.000134712	2.91269e-06	0.00269424	0.000873808	0.00200248	0.000728173	0.0728173	0.0218452	0.000203746	5.3726e-06	0.00134645	0.000504096	0.00197683	0.000758953	7.28842e-06	2.18653e-06	0.000438094	0.000341735	2.94718e-05	2.03486e-05
burbot	Na	22.99	9.4	0.1	2670	254	1560	220	2033	297	0.408873	0.00434972	116.137	11.0483	67.8556	9.56938	88.4298	12.9187	0.618402	0.0114197	58.0398	12.1788	66.9865	12.5418	0.0088511	0.00129305	0.019049	0.0111708	0.00022488	0.000128028
burbot	Zn	65.38	0.0012	0.0006	5.78	0.2	0.882	0.2	1.4	0.6	1.83542e-05	9.17712e-06	0.0884062	0.00305904	0.0134904	0.00305904	0.0214133	0.00917712	2.77599e-05	1.38863e-05	0.0441811	0.00840352	0.0133176	0.00343649	2.1433e-06	9.18555e-07	0.00312421	0.00224729	1.15807e-05	9.79922e-06
lake trout	Mg	24.31	6.52	0.1	67.8	3	4.89	3	13.4	2	0.268202	0.00411353	2.78898	0.123406	0.201152	0.123406	0.551213	0.0822707	0.405643	0.00872912	1.39379	0.29351	0.156851	0.101915	5.5172e-05	8.23463e-06	0.00299716	0.0114573	0.00399622	0.0150786
lake trout	Ca	40.08	26.5	0.4	102	21	51.4	11	400432		0.661178	0.00998004	2.54491	0.523952	1.28244	0.274451	9990.82	0
lake trout	Sr	87.62	0.131	0.001	0.14	0.004	0.093	0.03	544	90	0.00149509	1.14129e-05	0.00159781	4.56517e-05	0.0010614	0.000342388	6.20863	1.02716	0.00226126	3.82487e-05	0.000798506	0.000165974	0.000827645	0.000320393	0.000621433	0.000102811	0.000453218	0.000204243	0.000638404	0.000200957
lake trout	Ba	137.33	0.0185	0.0004	0.253	0.05	0.193	0.02	1	0.6	0.000134712	2.91269e-06	0.00184228	0.000364087	0.00140537	0.000145635	0.00728173	0.00436904	0.000203746	5.3726e-06	0.000920679	0.000262748	0.00109586	0.000260571	7.28842e-07	4.37305e-07	0.000307462	0.00021456	2.94718e-05	2.03486e-05
lake trout	Na	22.99	9.4	0.1	2620	202	1330	340	2499	396	0.408873	0.00434972	113.963	8.78643	57.8512	14.789	108.699	17.2249	0.618402	0.0114197	56.9529	12.5208	45.1105	15.0395	0.0108799	0.00172407	0.0162405	0.0101338	0.00022488	0.000128028
lake trout	Zn	65.38	0.0012	0.0006	8.75	0.7	0.868	0.4	7	3	1.83542e-05	9.17712e-06	0.133833	0.0107066	0.0132762	0.00611808	0.107066	0.0458856	2.77599e-05	1.38863e-05	0.0668831	0.0147731	0.0103524	0.00526001	1.07165e-05	4.59278e-06	0.00307462	0.00253233	1.15807e-05	9.79922e-06
System	Element		Dmean	Dsd	Dmin	Dmax
In	Mg	DIn	0.000586127	0.00221157	1.86209e-05	0.0149
In	Sr	DIn	1.16946	0.368015	0.427	2.55
In	Ba	DIn	0.959753	0.66233	0.218776	2.99
In	Na	DIn	0.000280728	0.000159795	2.39883e-05	0.00055
In	Zn	DIn	0.231588	0.158091	0.0630957	0.630957

## Sheet: Figure_1
system	element	D	Dmin	Dmean	Dmax	Dsd
Abiogenic	Sr	DIn	0.813721	1.1851	2.55	0.35762
Fish1	Sr	Df1	1.22802	1.3727	1.58106	NA
Fish2	Sr	Df2	NA	0.350595	NA	0.0343626
Fish3	Sr	Df3	NA	0.274818	NA	0.0457032
Fish4	Sr	Df4	NA	0.0827107	NA	0.0377381
Mollusc1	Sr	DL	NA	0.216	NA	0.006
Mollusc2	Sr	DM	0.223529	0.301331	0.4	0.0611427
Coral1	Sr	Dc1	1.06599	1.12063	1.17527	NA
Coral2	Sr	Dc2	1.01816	1.06552	1.11287	NA
	Min Ratio Sr/Ca (mmol/mol)	Max Ratio Sr/Ca (mmol/mol)	Dmin	Dmean	Dmax	Dsd
Limpets	NA	NA	NA	0.216	NA	0.006
Mytilus	NA	NA	0.223529	0.301331	0.4	0.0611427
Coral1	9.004	9.927	1.06599	1.12063	1.17527	NA
Coral2	8.6	9.4	1.01816	1.06552	1.11287	NA
	[Sr]mmol/kg	[Ca]mol/kg	Ratio Sr/Ca (mmol/mol)
water	0.087	0.0103	8.4466
Literature data
Original data

## Sheet: Figure_2
system_details	system	element	D	Dmin	Dmean	Dmax	Dsd
Abiogenic aragonite	In	Ba	DIn	0.218776	0.959753	2.99	0.66233
Abiogenic aragonite	In	Li	DIn	1.12202e-05	0.000558586	0.0043	0.00103035
Abiogenic aragonite	In	Mg	DIn	1.86209e-05	0.000586127	0.0149	0.00221157
Abiogenic aragonite	In	Na	DIn	2.39883e-05	0.000135318	0.00055	0.00010689
Abiogenic aragonite	In	Sr	DIn	0.427	1.16946	2.55	0.368015
Abiogenic aragonite	In	Zn	DIn	0.0630957	0.231588	0.630957	0.158091
Acanthopagrus butcheri	S1	Ba	D1	0.0637293	0.227273	0.977064	0.382547
Acanthopagrus butcheri	S1	Li	D1	0.0133432	0.032567	0.0952821	0.0319975
Acanthopagrus butcheri	S1	Mg	D1	0.000161639	0.000246727	0.000396369	7.63483e-05
Acanthopagrus butcheri	S1	Sr	D1	1.22802	1.37271	1.58106	0.106303
Lota lota	S2	Ba	D1	NA	0.00368693	NA	0.0017964
Lota lota	S2	Ba	D4	NA	0.0357722	NA	0.010773
Lota lota	S2	Mg	D1	NA	0.0004177	NA	0.000175575
Lota lota	S2	Mg	D4	NA	0.000118756	NA	4.06807e-05
Lota lota	S2	Na	D1	NA	0.000132133	NA	3.13789e-05
Lota lota	S2	Na	D4	NA	0.0143129	NA	0.0021076
Lota lota	S2	Sr	D1	NA	0.710758	NA	0.13238
Lota lota	S2	Sr	D4	NA	0.350595	NA	0.0343626
Lota lota	S2	Zn	D1	NA	0.000160937	NA	8.05103e-05
Lota lota	S2	Zn	D4	NA	0.0772083	NA	0.050858
Lota lota	S3	Ba	D1	NA	0.000665085	NA	0.000429244
Salvelinus namaycush	S3	Ba	D4	NA	0.00357722	NA	0.0021484
Salvelinus namaycush	S3	Mg	D1	NA	0.000351747	NA	0.000234501
Salvelinus namaycush	S3	Mg	D4	NA	0.000136011	NA	2.05101e-05
Salvelinus namaycush	S3	Na	D1	NA	0.000241184	NA	8.90298e-05
Salvelinus namaycush	S3	Na	D4	NA	0.0175936	NA	0.00280681
Salvelinus namaycush	S3	Sr	D1	NA	0.750845	NA	0.316094
Salvelinus namaycush	S3	Sr	D4	NA	0.274818	NA	0.0457032
Salvelinus namaycush	S3	Zn	D1	NA	0.00103517	NA	0.000688087
Salvelinus namaycush	S3	Zn	D4	NA	0.386041	NA	0.25429
Sander vitreus	S4	Ba	D1	NA	0.00144242	NA	0.000297163
Sander vitreus	S4	Ba	D4	NA	0.0168724	NA	0.0028114
Sander vitreus	S4	Mg	D1	NA	9.70381e-05	NA	6.30869e-05
Sander vitreus	S4	Mg	D4	NA	6.56434e-05	NA	4.15401e-05
Sander vitreus	S4	Na	D1	NA	0.000191289	NA	5.27893e-05
Sander vitreus	S4	Na	D4	NA	0.0123885	NA	0.00416521
Sander vitreus	S4	Sr	D1	NA	0.91701	NA	0.134963
Sander vitreus	S4	Sr	D4	NA	0.0827107	NA	0.0377381
Sander vitreus	S4	Zn	D1	NA	0.000318406	NA	0.000177133
Sander vitreus	S4	Zn	D4	NA	0.076584	NA	0.0397873

## Sheet: Figure_3
species	elements	D	Dmean	Dsd	Dmin	Dmax
burbot	Na	D3	93.8545	19.7701	NA	NA
burbot	Mg	D3	3.36505	0.843873	NA	NA
burbot	Sr	D3	0.537254	0.126117	NA	NA
burbot	Ba	D3	6.60848	2.48027	NA	NA
burbot	Zn	D3	1591.54	851.745	NA	NA
burbot	K	D3	516.615	107.25	NA	NA
burbot	Rb	D3	852.146	182.356	NA	NA
burbot	Mn	D3	53.3762	15.0344	NA	NA
burbot	Pb	D3	162.208	606.043	NA	NA
lake trout	Na	D3	72.4134	15.9758	NA	NA
lake trout	Mg	D3	2.70164	0.571884	NA	NA
lake trout	Sr	D3	0.277653	0.0579025	NA	NA
lake trout	Ba	D3	3.55299	1.01829	NA	NA
lake trout	Zn	D3	1894.4	1035.9	NA	NA
lake trout	K	D3	410.325	94.5531	NA	NA
lake trout	Rb	D3	844.363	187.564	NA	NA
lake trout	Mn	D3	51.4612	17.089	NA	NA
lake trout	Pb	D3	380.258	509.089	NA	NA
burbot	Na	D2	1.15415	0.324572	NA	NA
burbot	Mg	D2	0.0844887	0.0295379	NA	NA
burbot	Sr	D2	0.918129	0.259991	NA	NA
burbot	Ba	D2	1.46818	0.787313	NA	NA
burbot	Zn	D2	0.301432	0.0966294	NA	NA
burbot	K	D2	1.41384	0.423216	NA	NA
burbot	Rb	D2	1.90482	0.557808	NA	NA
burbot	Mn	D2	3.01009	1.4019	NA	NA
burbot	Pb	D2	3.32886	12.4863	NA	NA
lake trout	Na	D2	1.00737	0.402294	NA	NA
lake trout	Mg	D2	0.143125	0.0977581	NA	NA
lake trout	Sr	D2	1.31823	0.579215	NA	NA
lake trout	Ba	D2	1.51382	0.562323	NA	NA
lake trout	Zn	D2	0.196856	0.109064	NA	NA
lake trout	K	D2	1.09692	0.385338	NA	NA
lake trout	Rb	D2	1.65504	0.648756	NA	NA
lake trout	Mn	D2	2.42756	1.29223	NA	NA
lake trout	Pb	D2	1.01071	1.31424	NA	NA
burbot	Na	D1	0.000132133	3.13789e-05	NA	NA
burbot	Mg	D1	0.0004177	0.000175575	NA	NA
burbot	Sr	D1	0.710758	0.13238	NA	NA
burbot	Ba	D1	0.00368693	0.0017964	NA	NA
burbot	Zn	D1	0.000160937	8.05103e-05	NA	NA
burbot	K	D1	2.61746e-05	6.74708e-06	NA	NA
burbot	Rb	D1	1.01927e-05	2.60448e-06	NA	NA
burbot	Mn	D1	0.000128322	8.857e-05	NA	NA
burbot	Pb	D1	0.000132588	0.000100214	NA	NA
lake trout	Na	D1	0.000241184	8.90298e-05	NA	NA
lake trout	Mg	D1	0.000351747	0.000234501	NA	NA
lake trout	Sr	D1	0.750845	0.316094	NA	NA
lake trout	Ba	D1	0.000665085	0.000429244	NA	NA
lake trout	Zn	D1	0.00103517	0.000688087	NA	NA
lake trout	K	D1	7.51497e-05	2.14438e-05	NA	NA
lake trout	Rb	D1	2.1809e-05	7.48441e-06	NA	NA
lake trout	Mn	D1	0.000487977	0.000376574	NA	NA
lake trout	Pb	D1	0.000259854	0.000177802	NA	NA
burbot	Na	D4	0.0143129	0.0021076	NA	NA
burbot	Mg	D4	0.000118756	4.06807e-05	NA	NA
burbot	Sr	D4	0.350595	0.0343626	NA	NA
burbot	Ba	D4	0.0357722	0.010773	NA	NA
burbot	Zn	D4	0.0772083	0.050858	NA	NA
burbot	K	D4	0.0191182	0.00269978	NA	NA
burbot	Rb	D4	0.0165446	0.00263323	NA	NA
burbot	Mn	D4	0.0206172	0.012001	NA	NA
burbot	Pb	D4	0.0715931	0.0486127	NA	NA
lake trout	Na	D4	0.0175936	0.00280681	NA	NA
lake trout	Mg	D4	0.000136011	2.05101e-05	NA	NA
lake trout	Sr	D4	0.274818	0.0457032	NA	NA
lake trout	Ba	D4	0.00357722	0.0021484	NA	NA
lake trout	Zn	D4	0.386041	0.25429	NA	NA
lake trout	K	D4	0.0338246	0.00356671	NA	NA
lake trout	Rb	D4	0.030477	0.00353614	NA	NA
lake trout	Mn	D4	0.0609606	0.0396216	NA	NA
lake trout	Pb	D4	0.0998694	0.0753823	NA	NA
In	Ba	DIn	0.444161	0.13541	0.218776	0.676083
In	Li	DIn	0.00324	0.000642651	1.12202e-05	0.0043
In	Mg	DIn	0.00012529	9.55283e-05	1.86209e-05	0.000416869
In	Na	DIn	0.000280728	0.000159795	2.39883e-05	0.00055
In	Sr	DIn	1.20848	0.374727	0.9	2.55
In	Zn	DIn	0.231588	0.158091	0.0630957	0.630957
